# Supplementary material for: Level of agreement between patient-reported EQ-5D responses and EQ-5D responses mapped from the SF-12 in an injury population
Source: Springer Nature journal article supplement (doi:10.1186/s12963-015-0047-z), 2015-06-12
Supplement: MOESM1 [file 9766214]

**Supplementary Table: Kappa statistics stratified by source of data**

| EQ-5D item         | VSTR**<br>Kappa (95% CI) | VOTOR<br>Kappa (95% CI) | VSTR<br>PABAK* (95% CI) | VOTOR<br>PABAK (95% CI) |
|--------------------|--------------------------|-------------------------|-------------------------|-------------------------|
| <b>6 months</b>    | <b>N = 2394</b>          | <b>N = 5110</b>         | <b>N = 2394</b>         | <b>N = 5110</b>         |
| Mobility           | 0.46 (0.43, 0.50)        | 0.44 (0.41, 0.46)       | 0.62 (0.59, 0.64)       | 0.60 (0.58, 0.62)       |
| Self-care          | 0.22 (0.17, 0.27)        | 0.16 (0.13, 0.20)       | 0.74 (0.71, 0.76)       | 0.77 (0.75, 0.78)       |
| Usual activities   | 0.42 (0.39, 0.45)        | 0.35 (0.33, 0.38)       | 0.52 (0.49, 0.54)       | 0.49 (0.47, 0.51)       |
| Pain/discomfort    | 0.41 (0.38, 0.44)        | 0.36 (0.34, 0.39)       | 0.49 (0.46, 0.52)       | 0.47 (0.45, 0.49)       |
| Anxiety/depression | 0.44 (0.41, 0.48)        | 0.41 (0.38, 0.43)       | 0.57 (0.54, 0.59)       | 0.62 (0.60, 0.64)       |
| <b>12 months</b>   | <b>N = 2846</b>          | <b>N = 5876</b>         | <b>N = 2846</b>         | <b>N = 5876</b>         |
| Mobility           | 0.45 (0.42, 0.49)        | 0.47 (0.45, 0.49)       | 0.63 (0.60, 0.65)       | 0.66 (0.64, 0.67)       |
| Self-care          | 0.23 (0.18, 0.27)        | 0.17 (0.13, 0.20)       | 0.76 (0.74, 0.78)       | 0.81 (0.79, 0.82)       |
| Usual activities   | 0.43 (0.40, 0.46)        | 0.40 (0.38, 0.43)       | 0.55 (0.53, 0.58)       | 0.56 (0.55, 0.58)       |
| Pain/discomfort    | 0.43 (0.40, 0.46)        | 0.42 (0.40, 0.44)       | 0.51 (0.48, 0.54)       | 0.52 (0.50, 0.54)       |
| Anxiety/depression | 0.42 (0.39, 0.45)        | 0.43 (0.41, 0.46)       | 0.56 (0.53, 0.58)       | 0.66 (0.64, 0.67)       |

\*VSTR, Victorian State Trauma Registry; \*\*VOTOR, Victorian Orthopaedic Trauma Outcomes Registry; \*\*\*PABAK, Prevalence And Bias Adjusted Kappa
